# Supplementary material for: The ADC API: A Web API for the Programmatic Query of the AIRR Data Commons
Source: Front Big Data. 2020 Jun 17;3:22. doi: 10.3389/fdata.2020.00022 (PMC7931935; doi:10.3389/fdata.2020.00022)
Supplement: Supplementary file 1 [file Table_1.XLSX]

## Sheet: Sheet
AIRR Community Manuscript Endorsement - ADC API - September 2019
Name	Affiliation	Email address	Do you approve the manuscript as an official communication from the AIRR Community?	Do you want to be listed as a member of the AIRR Community who endorses this manuscript?
Open-Ended Response	Open-Ended Response	Open-Ended Response	Response	Response
Eline T. Luning Prak	Perelman School of Medicine, University of Pennsylvania	luning@pennmedicine.upenn.edu	Yes	Yes
Steven Kleinstein	Yale School of Medicine	steven.kleinstein@yale.edu	Yes	Yes
Thomas MacCarthy	Stony Brook University	thomas.maccarthy@stonybrook.edu	Yes	Yes
Adrien SIX	Sorbonne Université; Inserm U959	adrien.six@sorbonne-universite.fr	Yes	Yes
Ignacio Sanz	Emory University	ignacio.sanz@emory.edu	Yes	Yes
Marcelo Macedo Brigido	UnB	mmbrigido@gmail.com	Yes	Yes
George Blanck	USF	gblanck@health.usf.edu	Yes	Yes
Susanna Marquez	Department of Pathology, Yale School of Medicine	susanna.marquez@yale.edu	Yes	Yes
Erick Matsen		ematsen@gmail.com	Yes	Yes
Davide Bagnara	University of Genoa, Italy	davide.bagnara@edu.unige.it	Yes	Yes
Victor Greiff	University of Oslo	victor.greiff@medisin.uio.no	Yes	Yes
Manu Shankar-Hari	King's College London	manu.shankar-hari@kcl.ac.uk	Yes	Yes
Bruno Gaeta	School of Computer Science and Engineering, UNSW Sydney	bgaeta@unsw.edu.au	Yes	Yes
Jason Anthony Vander Heiden	Department of Bioinformatics and Computational Biology, Genentech	vanderheiden.jason@gene.com	Yes	Yes
Hiroto Katoh	the University of Tokyo	hkat-prm@m.u-tokyo.ac.jp	Yes	Yes
Ademar Aguiar	INESC TEC & FEUP, Universidade do Porto	ademar.aguiar@fe.up.pt	Yes	Yes
Jamie Scott	Simon Fraser University	jkscott@sfu.ca	Yes	Yes
Sarah Taylor	10x Genomics	sarah.taylor@10xgenomics.com	Yes	Yes
Scott Christley	UT Southwestern Medical Center	scott.christley@utsouthwestern.edu	Yes	Yes
Bjoern Peters	La Jolla Institute for Immunology	bpeters@lji.org	Yes	Yes
Artur Rocha	INESC TEC	artur.rocha@inesctec.pt	Yes	Yes
Eric Waltari	Chan Zuckerberg Biohub	eric.waltari@czbiohub.org	Yes	Yes
Srialkshmy Harikrishnan	DKFZ	srilakshmy.harikrishnan@dkfz-heidelberg.de	Yes	Yes
Andrew Collins	University of New South Wales	a.collins@unsw.edu.au	Yes	Yes
Syed Ahmad Chan Bukhari	St. John's University, NYC	bukharis@stjohns.edu	Yes	Yes
Brian Corrie	SFU	bcorrie@sfu.ca	Yes	Yes
Xiao Liu	BGI-Shenzhen	airson_liu@163.com	Yes	Yes
Jacob Galson	Kymab Ltd	jacob.galson@kymab.com	Yes	Yes
Henk-Jan van den Ham	ENPICOM B.V., 's-Hertogenbosch, The Netherlands	h.j.vandenham@enpicom.com	Yes	Yes
Adam Buntzman	University of Arizona	buntzman@email.arizona.edu	Yes	Yes
Mikhail Shugay	Skolkovo Institute of Science and Technology	mikhail.shugay@gmail.com	Yes	Yes
Marcelo Macedo Brigido	UnB	mmbrigido@gmail.com	Yes	Yes
Johannes Trück	University Children's Hospital Zurich and the Children's Research Center, University of Zurich, Zurich, Switzerland	johannes.trueck@kispi.uzh.ch	Yes	Yes
Cathrine Scheepers	Center for HIV and STIs, National Institute for Communicable Diseases and School of Pathology, University of the Witwatersrand, Johannesburg, South Africa	cathrinem@nicd.ac.za	Yes	Yes
Pei-Lung Chen	Graduate Institute of Medical Genomics and Proteomics, National Taiwan University	paylong@ntu.edu.tw	Yes	Yes
Ramit Mehr	Bar-Ilan University	ramit.mehr@biu.ac.il	Yes	Yes
William	Lees	william@lees.org.uk	Yes	Yes
Daniel Douek	NIH Vaccine Research Center	douek@mail.nih.gov	Yes	Yes
Duncan Ralph	Fred Hutchinson Cancer Research Center	dkralph@gmail.com	Yes	Yes
Jean-Philippe Bürckert	BISC Global	jean.buerckert@gmail.com	Yes	Yes
Mats Ohlin	Lund University, Dept. of Immunotechnology	mats.ohlin@immun.lth.se	Yes	Yes
Uri Laserson	Icahn School of Medicine at Mount Sinai	uri@lasersonlab.org	Yes	Yes
Bojan Zimonja	SFU	bzimonja@sfu.ca	Yes	Yes
Collin Joyce	The Scripps Research Institute	cjoyce@scripps.edu	Yes	Yes
Adrian Shepherd	Birkbeck, University of London	a.shepherd@mail.cryst.bbk.ac.uk	Yes	Yes
Christopher Dubay	Providence St. Joseph Health	christopher.dubay@providence.org	Yes	Yes
Brian G. Pierce	University of Maryland Institute for Bioscience and Biotechnology Research	pierce@umd.edu	Yes	Yes
Chaim A Schramm	Vaccine Research Center, National Institute of Allergy and Infectious Diseases, National Institutes of Health, Bethesda, MD, USA	chaim.schramm@NIH.gov	Yes	Yes
Manu Shankar-Hari	King’s College London	manu.shankar-hari@kcl.ac.uk	Yes	Yes
Ning Jiang	The University of Texas at Austin	jiang@austin.utexas.edu	Yes	Yes
